# Supplementary material
Source: Copernicus journal article supplement (doi:10.5194/bg-23-3073-2026)
Supplement: Supplementary file 1 [file bg-23-3073-2026-supplement.pdf]

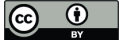

*Supplement of*

## **Unexpected quasi-independence of coloured dissolved organic matter absorption from chlorophyll-*a* concentration in the Southern Ocean**

**Juan Li et al.**

*Correspondence to:* Juan Li ([juan.li@takuvik.ulaval.ca](mailto:juan.li@takuvik.ulaval.ca))

The copyright of individual parts of the supplement might differ from the article licence.

**Table S1 Number (N) of BGC-Argo float profiles eliminated based on various criteria and quality controls used in this study. Criteria are successively applied as they appear in this Table, which is why the number of “Bad chlorophyll profile” and “Bad  $b_b(700\text{ nm})$  profile” can be different for each spectral band.**

|                                               | Southern Ocean<br>< 40° S |        |        | Low-latitude Ocean<br>40° S to 60° N |        |        |
|-----------------------------------------------|---------------------------|--------|--------|--------------------------------------|--------|--------|
| N floats                                      | 60                        |        |        | 211                                  |        |        |
| N profiles, total                             | 10,579                    |        |        | 35,591                               |        |        |
| N discarded profiles                          |                           |        |        |                                      |        |        |
| Depth < 200 m                                 | 30                        |        |        | 1,396                                |        |        |
| Sun elevation < 15°                           | 2,472                     |        |        | 4,997                                |        |        |
|                                               | 380 nm                    | 412 nm | 490 nm | 380 nm                               | 412 nm | 490 nm |
| Out-of-range $Z_{pd}$                         | 2,516                     | 2,600  | 2,563  | 12,294                               | 12,708 | 12,281 |
| $K_d < K_w$                                   | 14                        | 45     | 279    | 379                                  | 961    | 2,649  |
| Bad chlorophyll profile <sup>‡</sup>          | 0                         | 0      | 0      | 25                                   | 23     | 23     |
| Bad $b_b(700\text{ nm})$ profile <sup>‡</sup> | 488                       | 482    | 469    | 1,741                                | 1,652  | 1,584  |
| Bad $E_d$ profile <sup>‡</sup> , per band     | 2                         | 2      | 2      | 4                                    | 4      | 3      |
| Surface average $b_{bp} < 0$                  | 28                        | 27     | 29     | 764                                  | 681    | 617    |
| Retrieved $a_y$ values < 0                    | 76                        | 191    | 996    | 374                                  | 859    | 3,582  |
| Number of profiles used                       | 4,953                     | 4,730  | 3,739  | 13,617                               | 12,310 | 8,459  |

<sup>‡</sup> from any flag other than “A” or “B” following the BGC-Argo nomenclature (Argo data management, 2025). Synthetic BGC Argo netCDF files have been used (file extension “Sprof”).

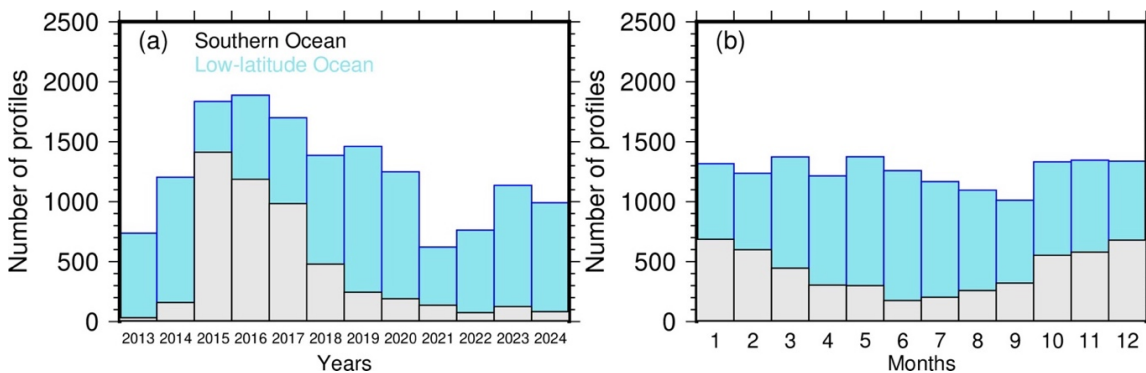

**Figure S1: Time distribution of the selected set of BGC-Argo profiles over (a) years and (b) months.**

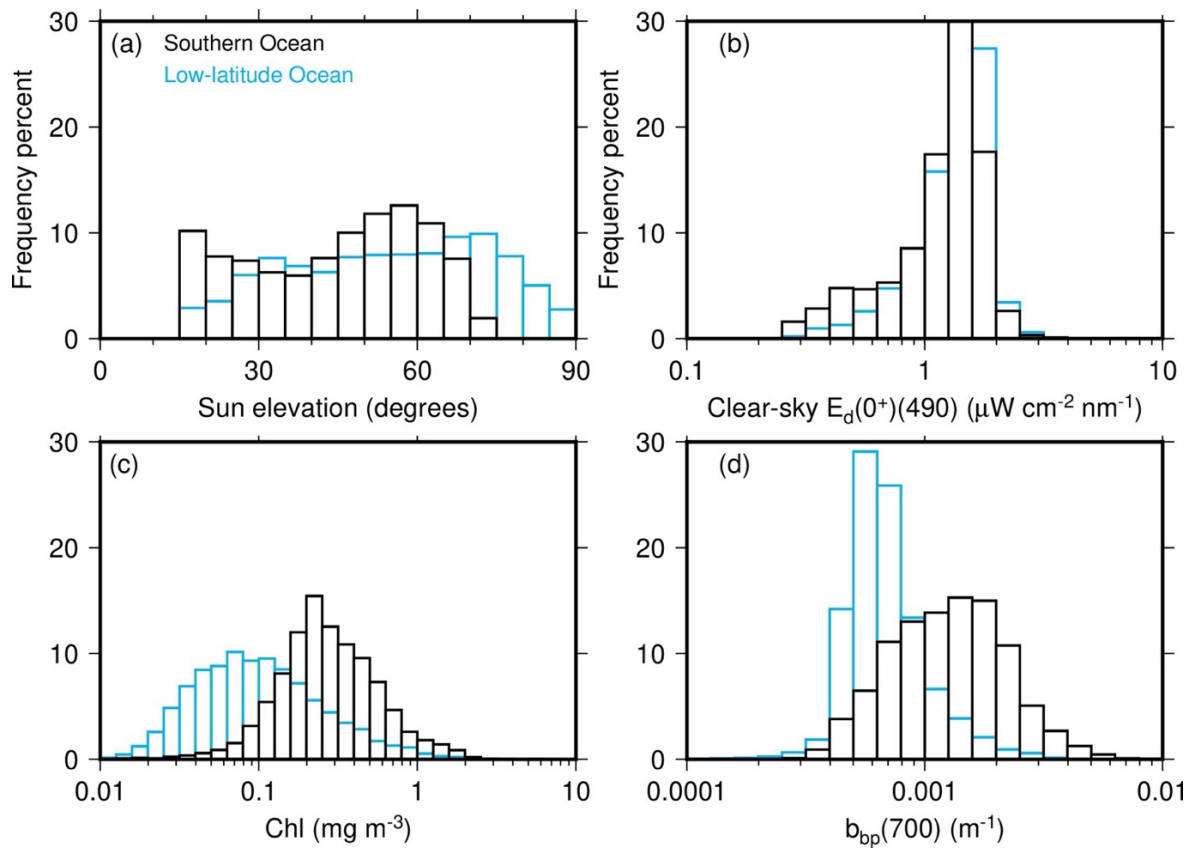

**Figure S2: Distribution of (a) sun elevation, (b) measured downward irradiance at 490 nm for values within 20% of the clear-sky value calculated following Gregg and Carder (1990) (data outside of this range are also used, however), (c) Chl and (d)  $b_{bp}$  at 700 nm.**

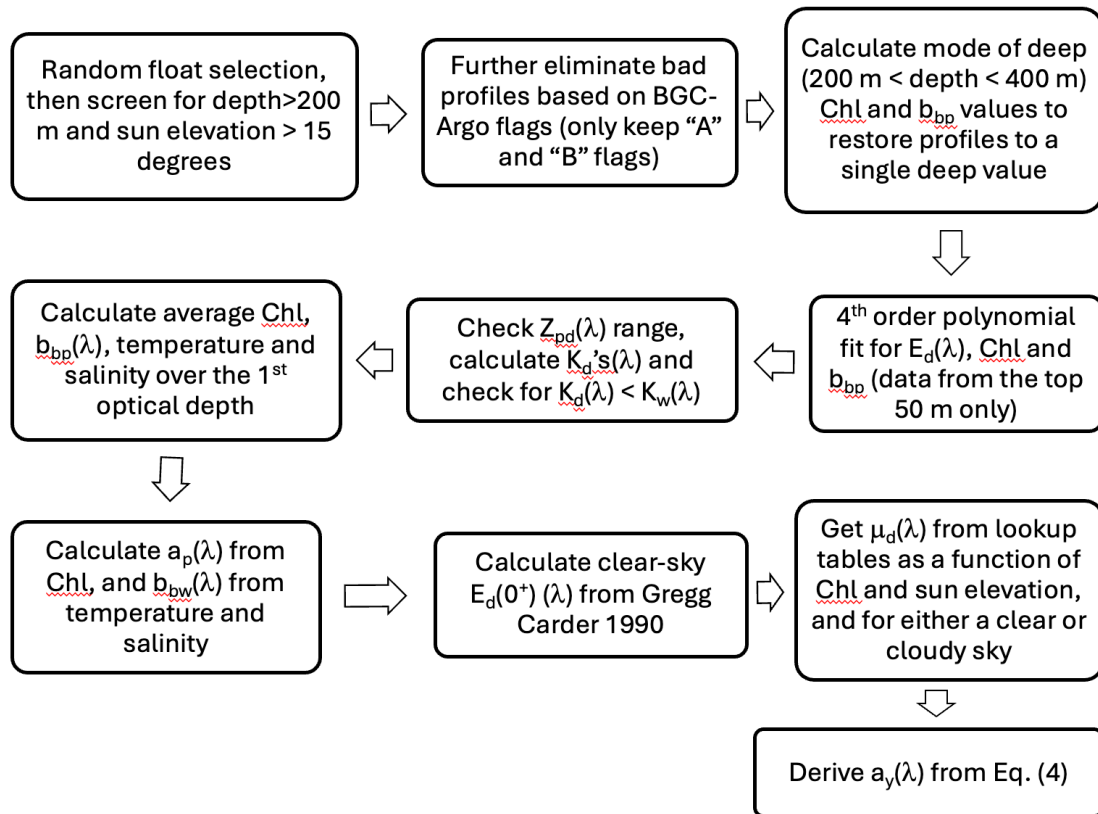

Figure S3: Workflow for the processing of the BGC-Argo data, from profiles of  $E_d(\lambda)$ ,  $b_{bp}$  at 700 nm and Chl, down to deriving the CDOM absorption coefficient  $a_y$ .

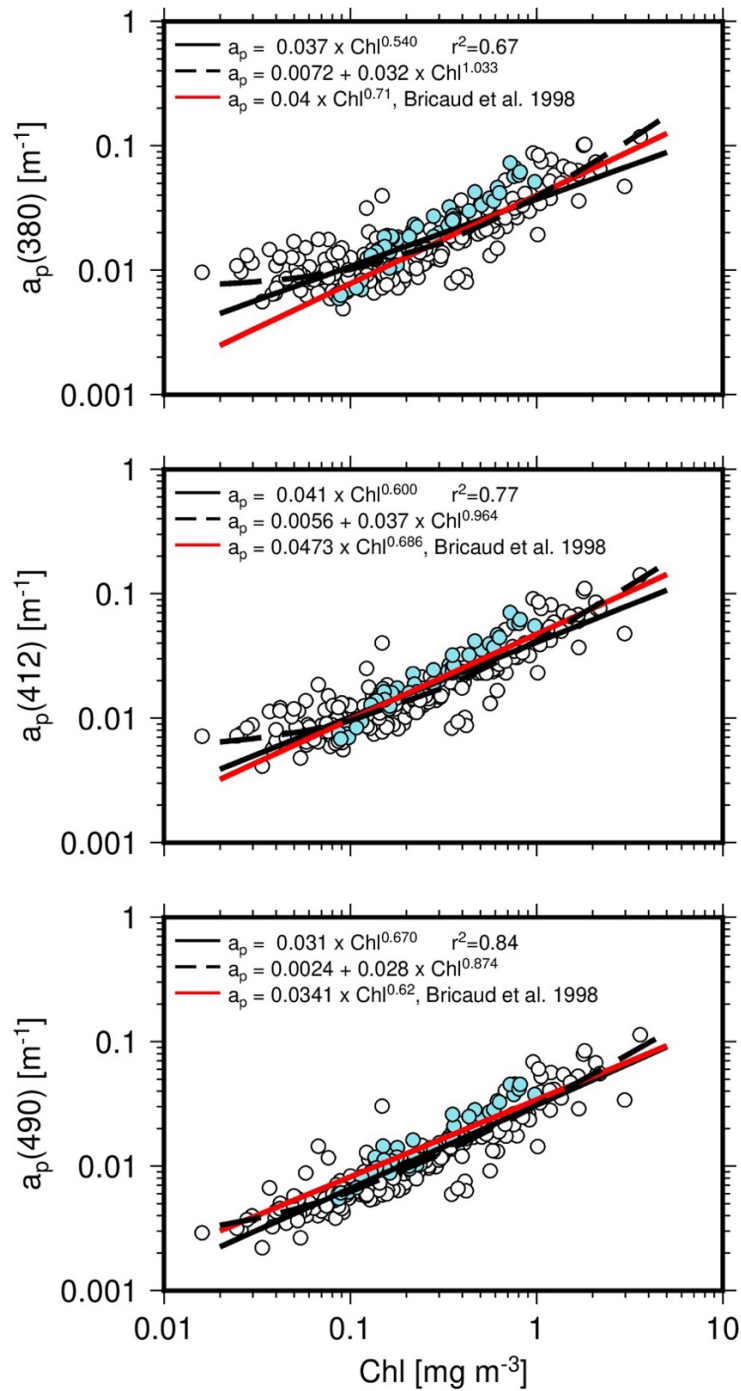

Figure S4: Particulate absorption coefficient at the three wavelengths indicated as a function of Chl. The data are from the ACE (open dots) and SOLACE (turquoise) research voyages. The solid black lines are linear fits on the log-transformed data. The dashed black lines are non-linear fits (Eq. 5) on the same data. The red lines are the parameterization from Bricaud et al., (1998).

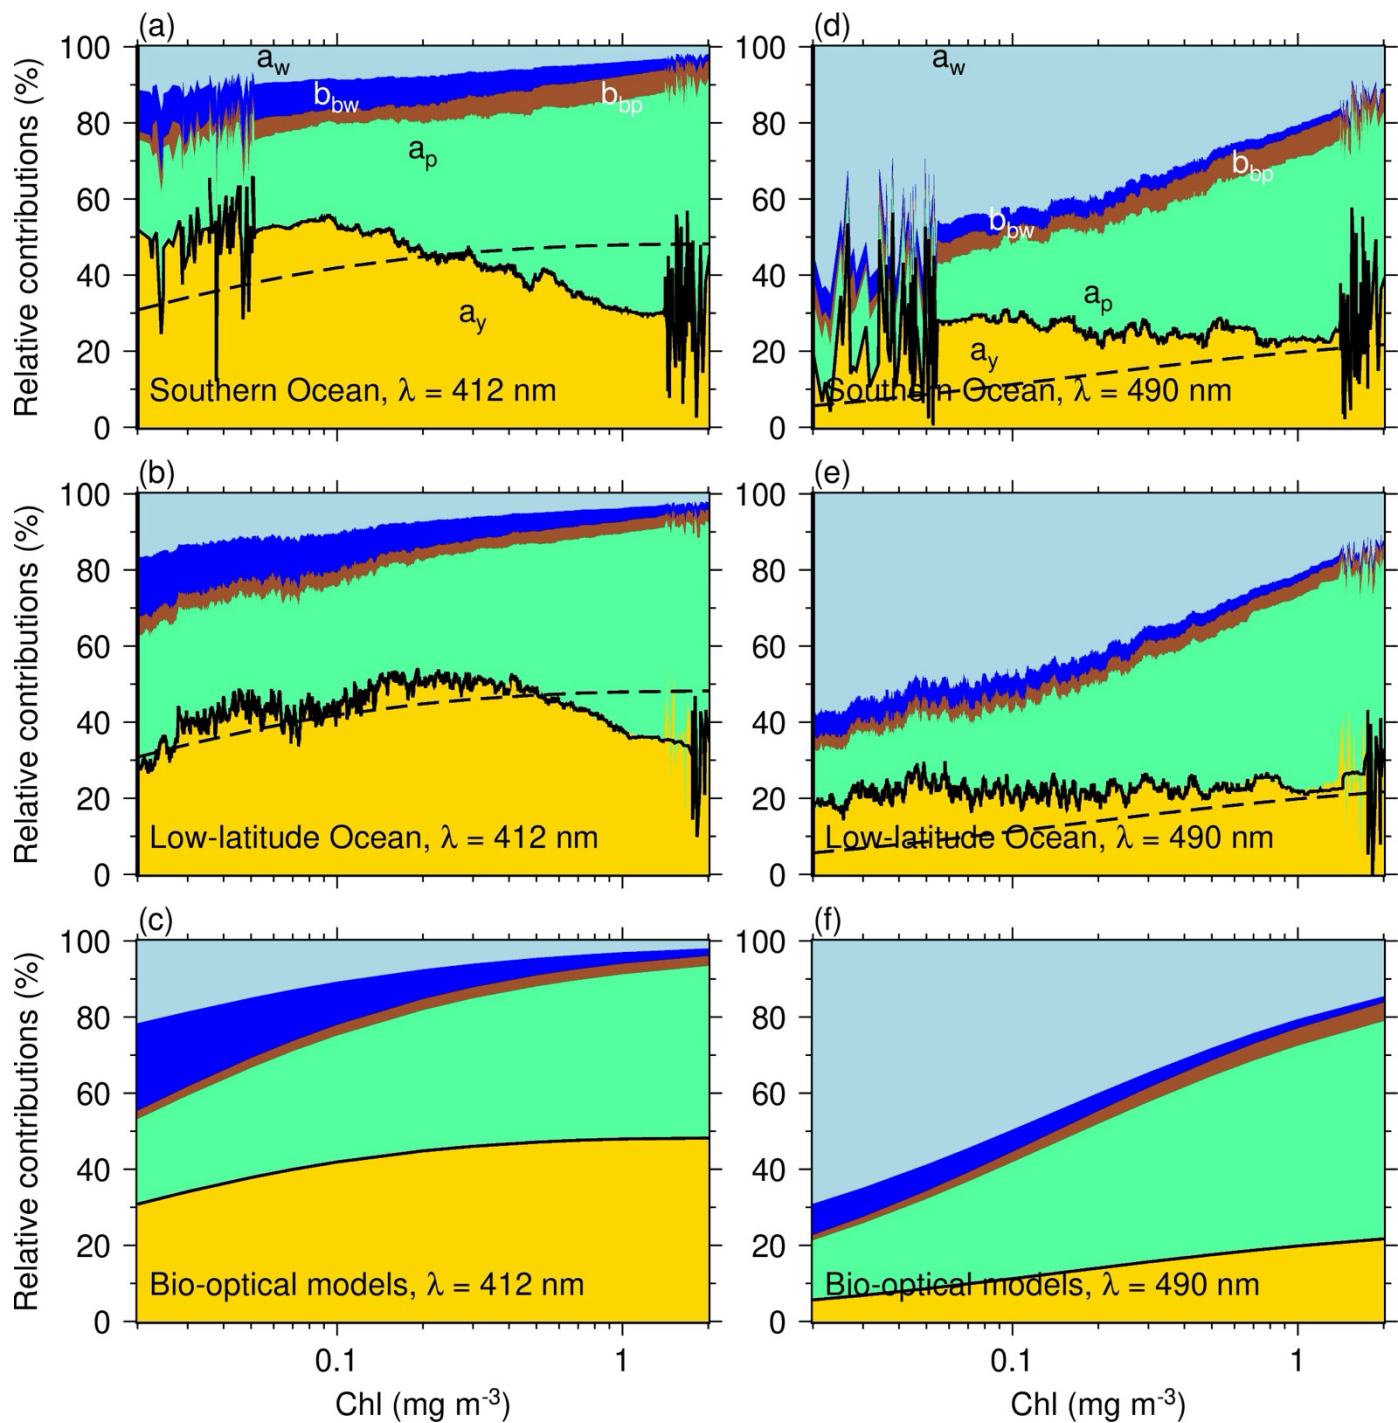

Figure S5: Relative contributions of  $a_w$  (light blue),  $b_{bw}$  (blue),  $b_{bp}$  (brown),  $a_p$  (green) and  $a_y$  (gold) in Eq. (4) at  $\lambda = 412$  and 490 nm, as a function of Chl. Panels (a,d) are for the SO, (b,e) for the low-latitude Oceans, and (c,f) are when using Bricaud et al., (1998) to calculate  $a_p$ , MG09 for  $a_y$ , and MM01 for  $b_{bp}$ . The thick black line delineates the contribution of  $a_y$  to the budget. This modelled relative contribution of  $a_y$  from panel (c,f) is reproduced in other panels as a dashed line. The increased noise in the curve for  $\text{Chl} < 0.03 \text{ mg m}^{-3}$  and  $\text{Chl} > \sim 1.5 \text{ mg m}^{-3}$  arises from the low numbers of retrievals in these ranges.
